# Supplementary material for: Serum Neutralizing and Enhancing Effects on African Swine Fever Virus Infectivity in Adherent Pig PBMC
Source: MDPI journal article supplement (doi:10.3390/v14061249), 2022-06-09
Supplement: s1 [file s1]

**Supplementary Materials:**

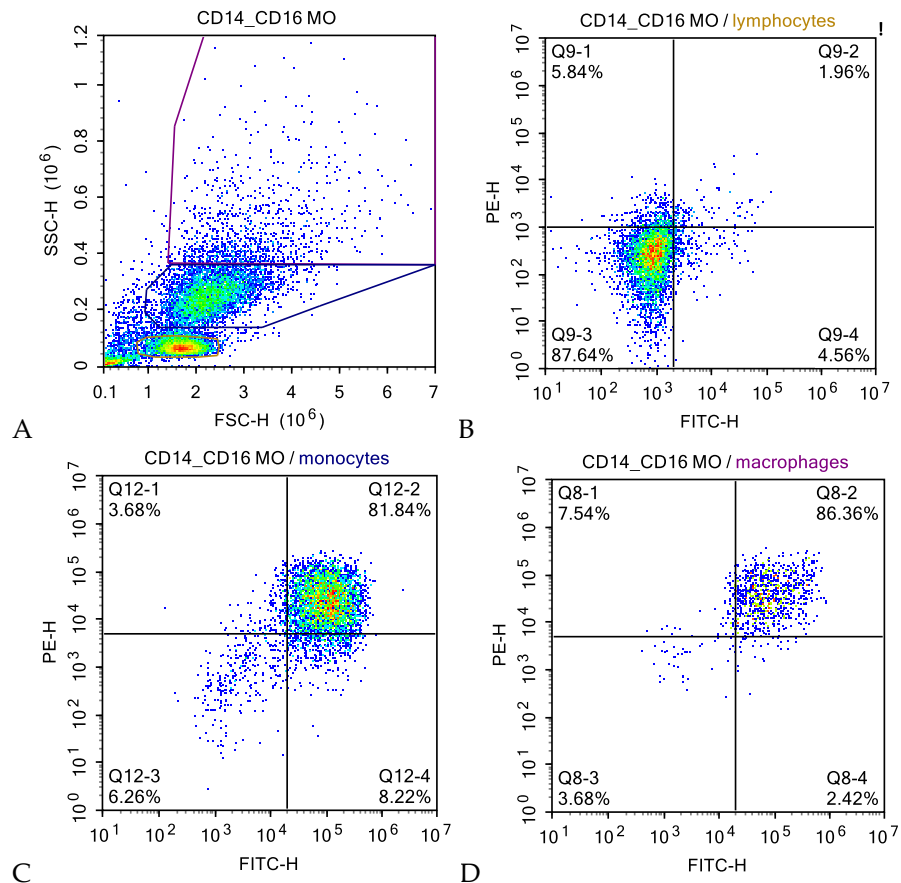

**Supplemental Figure S1.** Flow cytometry of non-infected adherent PBMC: (A) SSC-H vs FSC-H plot of adherent PBMC gated on lymphocytes, monocytes and macrophages; (B) CD14 (FITC) and CD16 (PE) staining of lymphocytes; (C) CD14 (FITC) and CD16 (PE) staining of monocytes; and (D) CD14 (FITC) and CD16 (PE) staining of macrophages

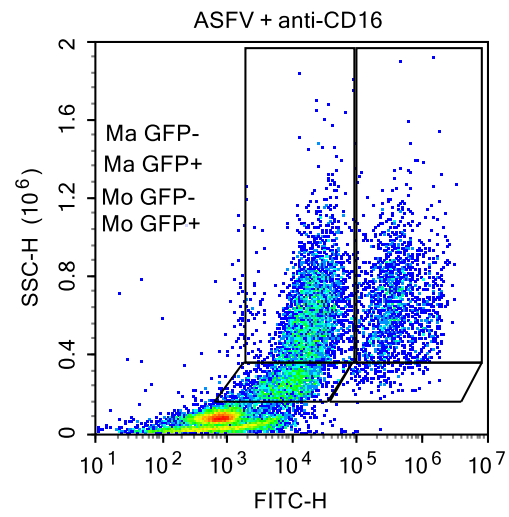

**Supplemental Figure S2.** The cell distribution on the SSC vs FITC (EGFP signal) plot of adherent PBMC gated on monocytes and macrophages after ASFV infection at MOI of 0.5 HAD<sub>50</sub>

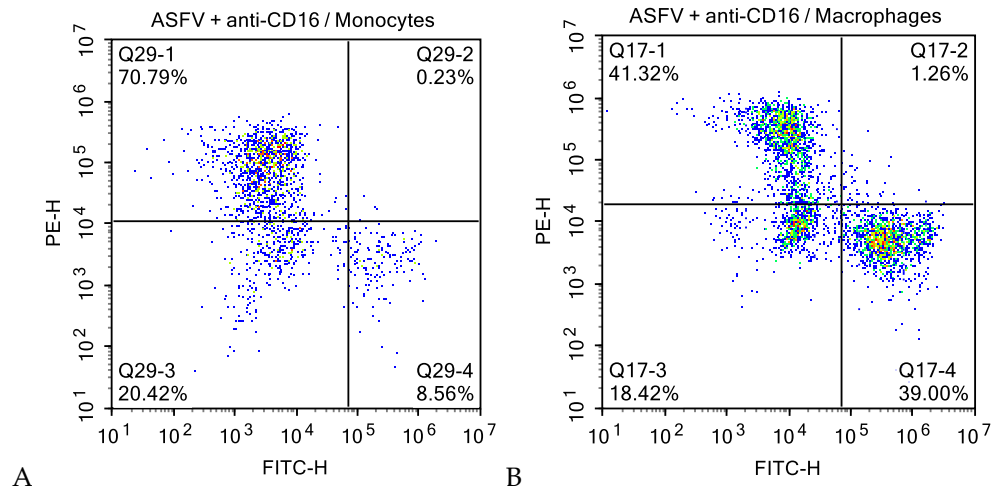

**Supplemental Figure S3.** The EGFP (FITC) vs CD16 (PE) plots of ASFV infected adherent PBMC gated on (A) monocytes and (B) macrophages

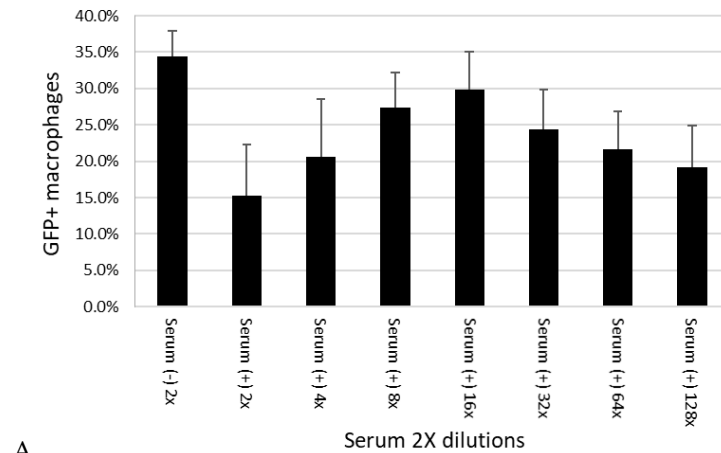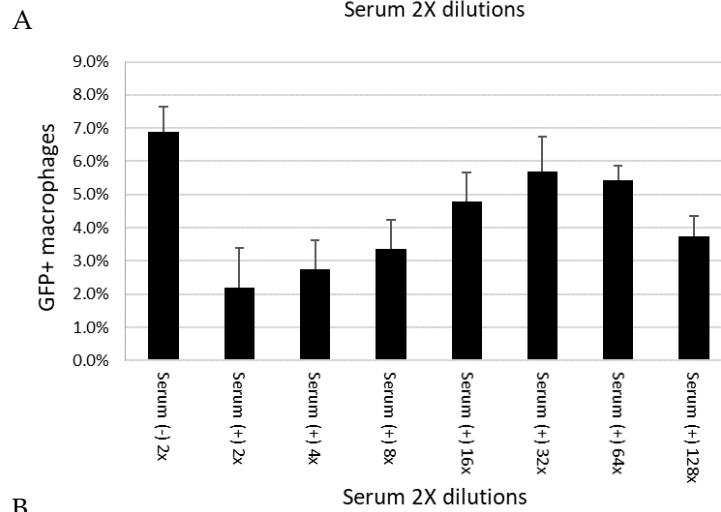

**Supplemental Figure S4.** The percentages of GFP+ macrophages treated with negative and hyperimmunized sera in 2X serial dilutions with culture medium as the diluent and ASFV infection at MOI of (A) 0.5 and (B) 0.05 HAD<sub>50</sub> in adherent PBMC isolated from the same donor pig

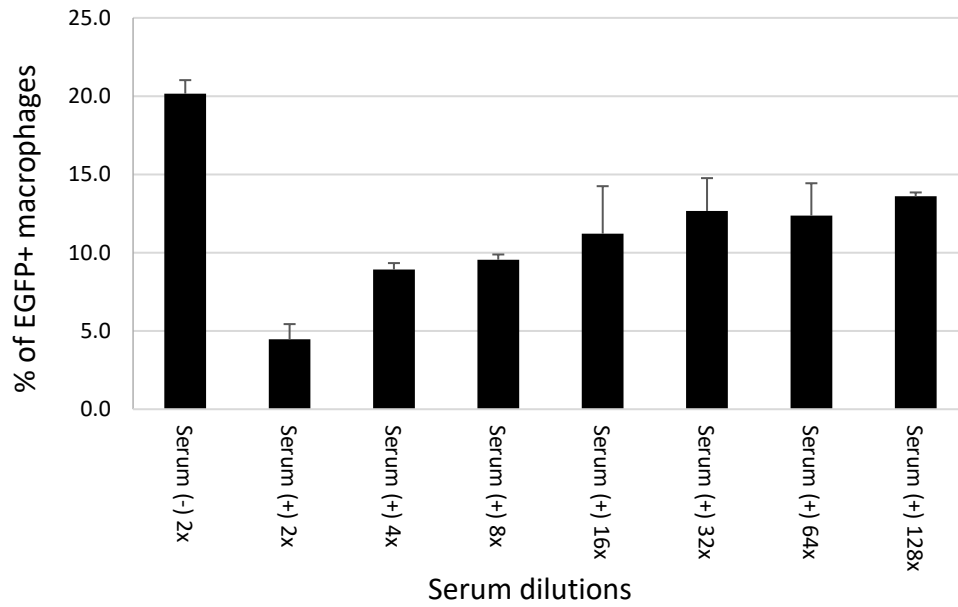

**Supplemental Figure S5.** The percentages of GFP+ macrophages treated with negative and hyperimmunized sera in 2X serial dilutions with a pooled negative serum as the diluents and ASFV infection at MOI of 0.5 HAD<sub>50</sub> in adherent PBMC isolated from another donor pig
